# Supplementary material for: In situ tuning of crystallization pathways by electron beam irradiation and heating in amorphous bismuth ferrite films
Source: Royal Society of Chemistry journal article supplement (doi:10.1039/c8ra02447b), 2018-01-01
Supplement: c8ra02447b1.pdf [file c8ra02447b1.pdf]

*Electronic supplementary information for*

*In Situ* Tuning Crystallization Pathways by Electron Beam Irradiation and  
Heating in Amorphous Bismuth Ferrite Films

Zhipeng Li<sup>a</sup>, Zhong Lin Wang<sup>a,b,c</sup>, and Zhiwei Wang<sup>a,b</sup>

<sup>a</sup> Beijing Institute of Nanoenergy and Nanosystems, Chinese Academy of Sciences,  
Beijing 100083, P. R. China

<sup>b</sup> School of Nanoscience and Technology, University of Chinese Academy of Sciences,  
Beijing 100049, P. R. China

<sup>c</sup> School of Materials Science and Engineering, Georgia Institute of Technology,  
Atlanta, Georgia 30332-0245, United States

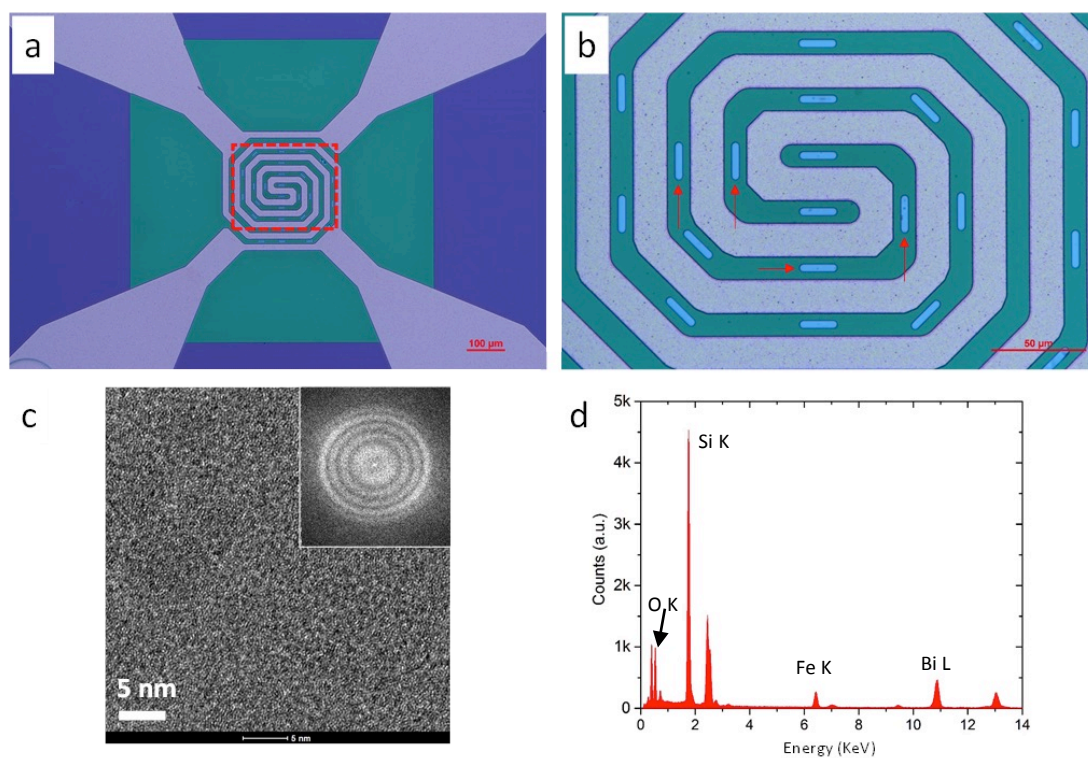

Figure S1. (a) The configuration of the TEM heating chips used in this study. (b) The enlarged view of the red squared region in (a). The red arrows indicate the electron transparent area for TEM observation. (c) TEM image and FFT pattern (inset) of the deposited film. (d) EDX spectrum of the deposited film. Fe is deficient (the atomic ratio of Bi and Fe is 3.8:1) according to our quantitative EDS analysis.

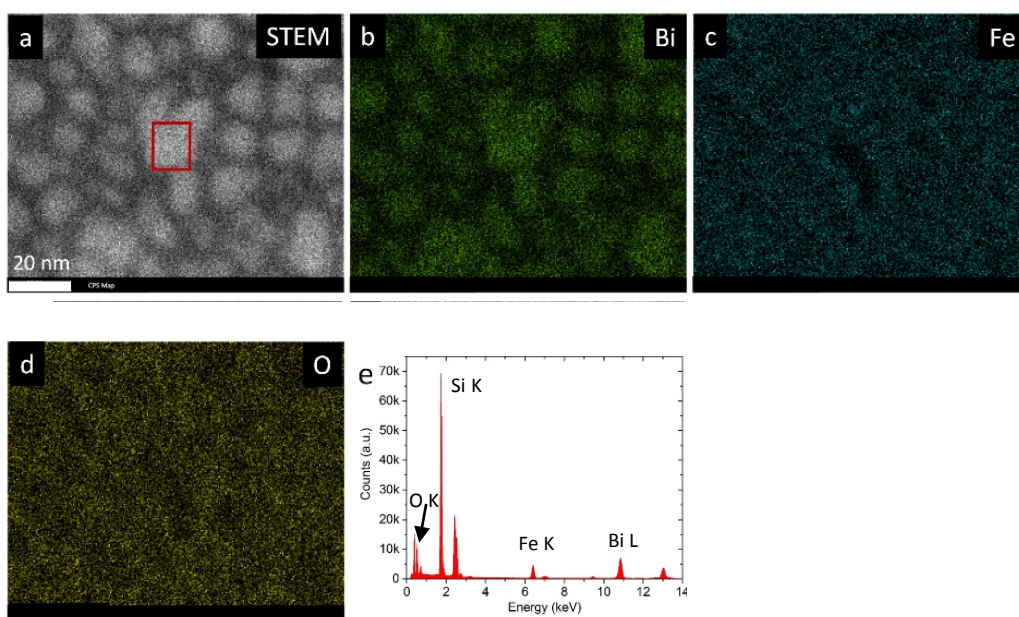

Figure S2. The EDX element mapping of bismuth ferrite thin film after electron beam radiation for 15 min (electron dose rate:  $2.6 \times 10^3 \text{ e}/(\text{\AA}^2 \text{ s})$ ). (a) High angle annular dark field (HAADF)-STEM image, (b) Bi, (c) Fe and (d) O elemental maps. (e) EDX spectrum of the whole image area in (a).

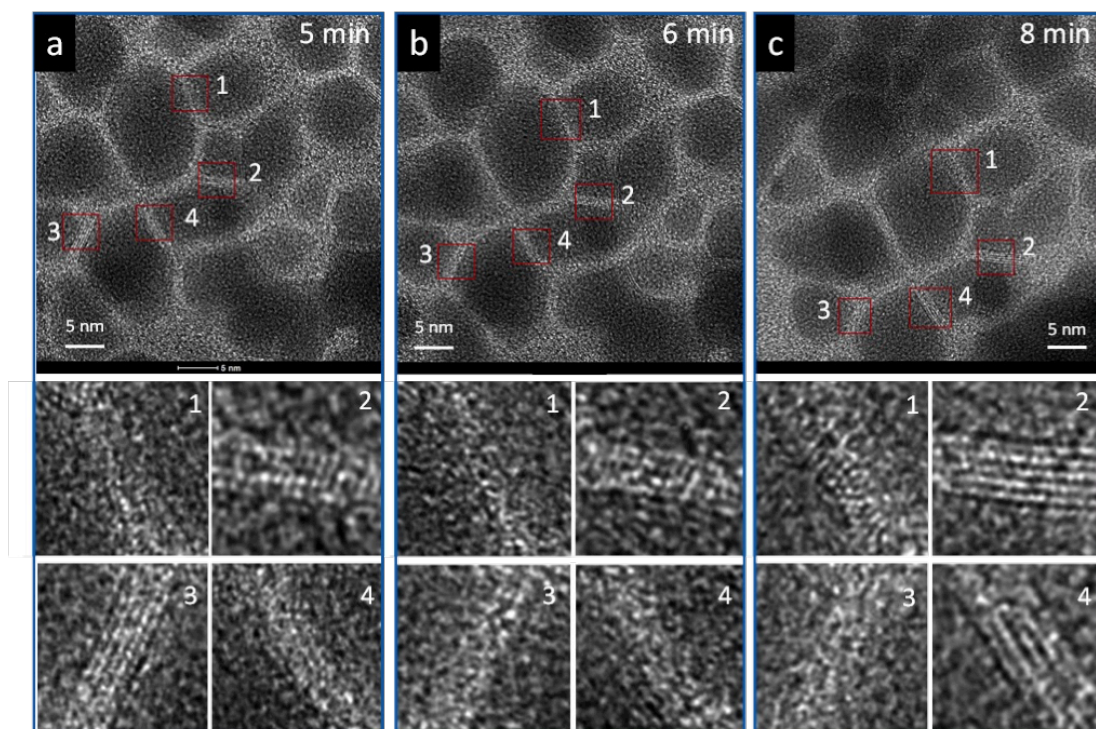

Figure S3. Time sequential HRTEM images of the same area under electron beam radiation at temperature of 300 °C. Several regions as marked by 1,2,3,4 are selected to track the microstructural evolution. The region 1 and 4 gradually transform from amorphous to crystalline state, the crystal orientation of region 2 rotates, while region 3 transforms from crystalline to amorphous state.
